# Supplementary material
Source: HighWire-hosted journal article supplement (https://bjgp.org/highwire/filestream/45836/field_highwire_adjunct_files/0/BJGP.2022.0474_suppl.pdf)

**SUPPLEMENTARY FIGURES AND TABLE**

**Figure S1 Flow chart showing included candidates and subsequent performance in the AKT**

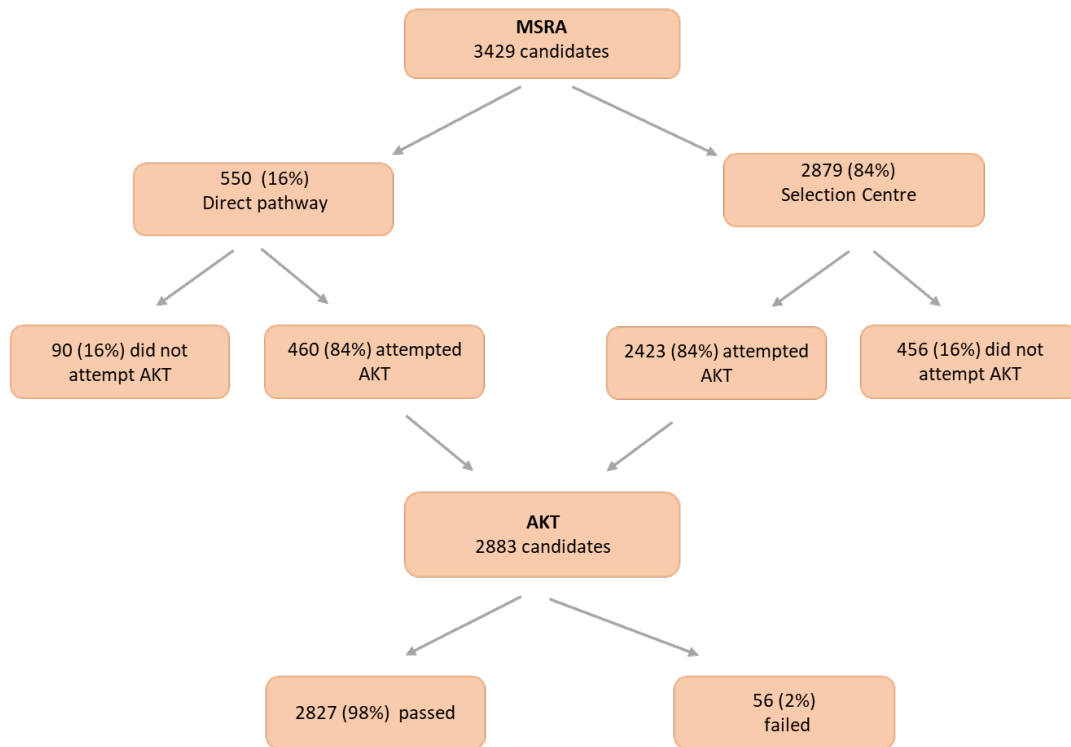

**Figure S2 Flow chart showing included candidates and subsequent performance in the CSA or RCA**

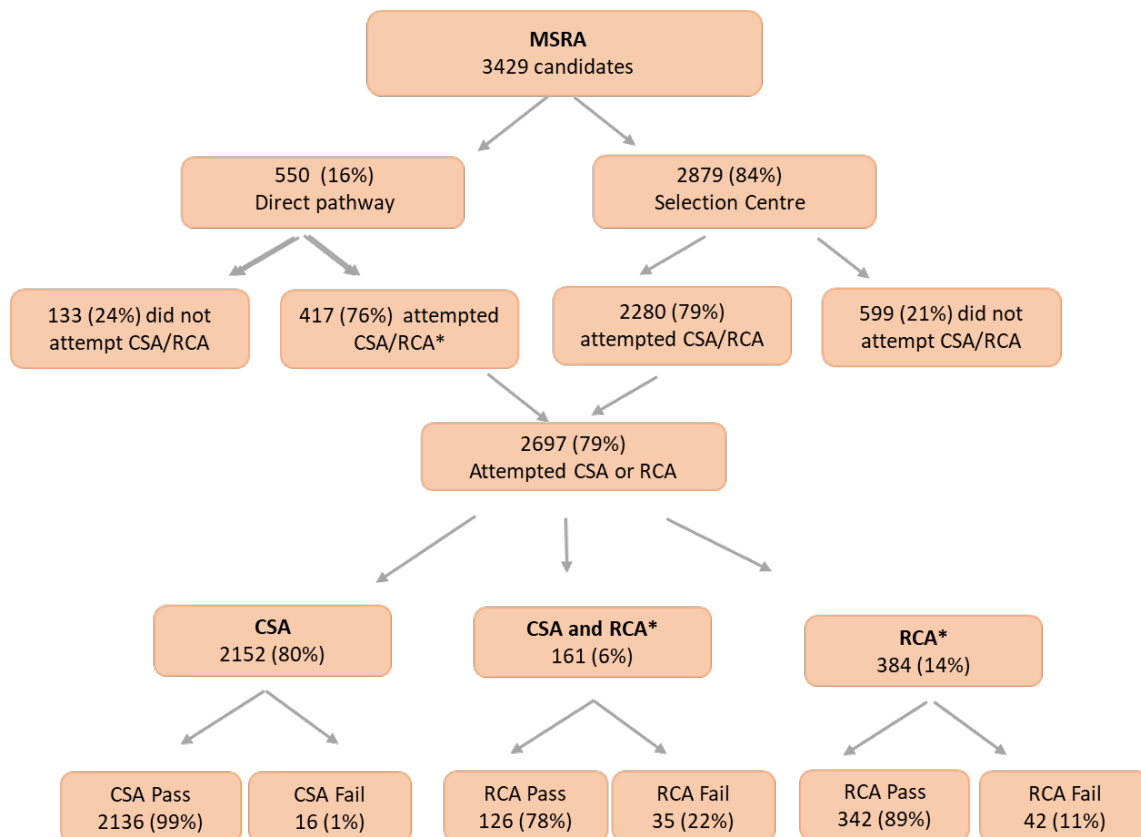

\*attempted both CSA and RCA.

**Figure S3 Flow chart showing included candidates and subsequent performance in the WPBA-ARCP**

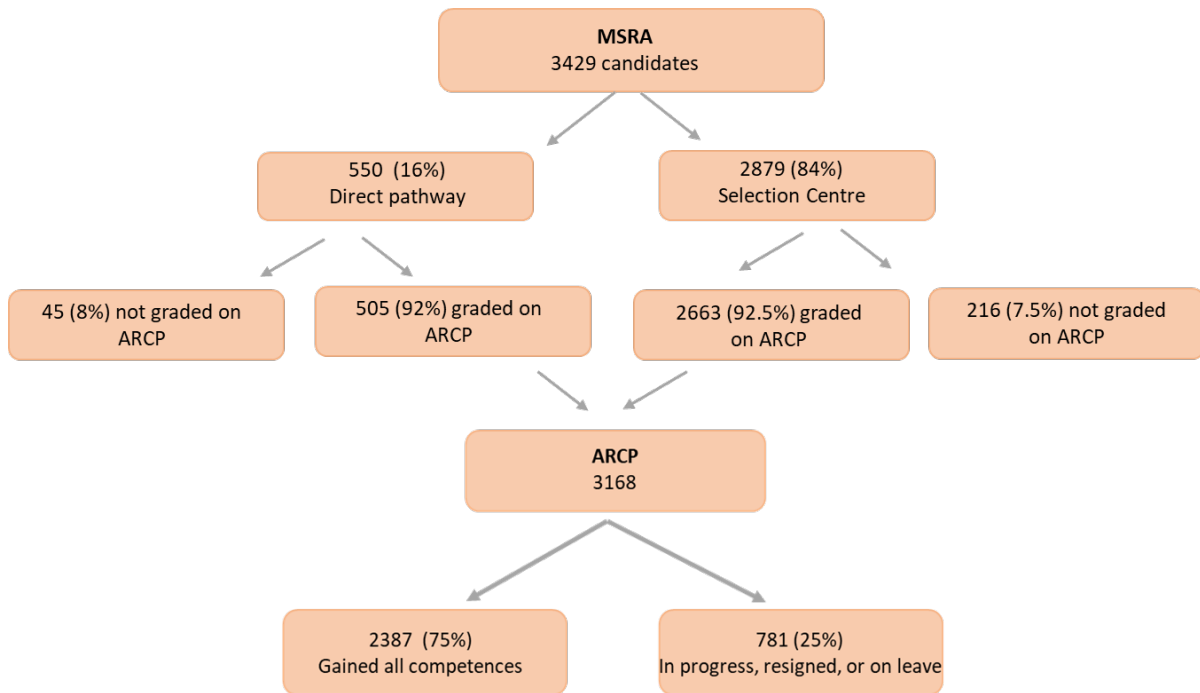

\*Graded = given an outcome at ARCP.

**Table S1 Demographic characteristics**

| <b>Ethnicity</b>                   | <b>Number</b> | <b>Percentage</b> |
|------------------------------------|---------------|-------------------|
| White                              | 1,755         | 51.2%             |
| Ethnic minority                    | 1,400         | 40.8%             |
| Mixed                              | 98            | 2.9%              |
| Missing                            | 176           | 5.1%              |
| <b>Gender</b>                      |               |                   |
| Female                             | 2,130         | 62.1%             |
| Male                               | 1,208         | 35.2%             |
| Missing                            | 91            | 2.7%              |
| <b>Qualification</b>               |               |                   |
| UK                                 | 2,632         | 76.8%             |
| Non-UK                             | 797           | 23.2%             |
| <b>Disability</b>                  |               |                   |
| No                                 | 1,822         | 53.1%             |
| Yes                                | 248           | 7.2%              |
| Missing                            | 1,359         | 39.6%             |
| <b>Qualification and ethnicity</b> |               |                   |
| White UK                           | 1,633         | 47.6%             |
| White non-UK                       | 122           | 3.6%              |
| Ethnic minority UK                 | 861           | 25.1%             |
| Ethnic minority non-UK             | 637           | 18.6%             |

**Table S2 Pass rates for AKT, CSA and RCA at each attempt for all candidates and different ethnic groups**

| Attempt | All candidates |         |         | White   |         |         | Ethnic minority |         |         | Mixed   |         |         | Missing |         |         |
|---------|----------------|---------|---------|---------|---------|---------|-----------------|---------|---------|---------|---------|---------|---------|---------|---------|
|         | AKT            | CSA     | RCA     | AKT     | CSA     | RCA     | AKT             | CSA     | RCA     | AKT     | CSA     | RCA     | AKT     | CSA     | RCA     |
| 1       | 2,178          | 1,858   | 465     | 1,270   | 1,045   | 214     | 740             | 666     | 219     | 71      | 54      | 15      | 97      | 93      | 17      |
|         | (75.5%)        | (80.3%) | (85.3%) | (86.9%) | (80.0%) | (95.5%) | (61.6%)         | (66.4%) | (77.9%) | (86.6%) | (87.1%) | (88.2%) | (70.3%) | (80.9%) | (51.0%) |
| 2       | 367            | 230     | 3       | 112     | 52      | 1       | 230             | 159     | 2       | 7       | 5       | -       | 18      | 14      | -       |
|         | (12.7%)        | (10.0%) | (0.5%)  | (7.7%)  | (4.0%)  | (0.4%)  | (19.2%)         | (15.9%) | (0.7%)  | (8.5%)  | (8.1%)  |         | (13.0%) | (12.2%) |         |
| 3       | 186            | 43      | -       | 47      | 3       | -       | 125             | 36      | -       | 2       | 1       | -       | 12      | 3       | -       |
|         | (6.6%)         | (1.9%)  |         | (3.2%)  | (0.2%)  |         | (10.4%)         | (3.6%)  |         | (2.4%)  | (1.6%)  |         | (8.6%)  | (2.6%)  |         |
| 4       | 85             | 5       | -       | 15      | -       | -       | 64              | 4       | -       | 1       | 1       | -       | 5       | -       | -       |
|         | (3.0%)         | (0.21%) |         | (1.0%)  |         |         | (5.3%)          | (0.4%)  |         | (1.2%)  | (1.6%)  |         | (3.6%)  |         |         |
| 5       | 11             | -       | -       | -       | -       | -       | 10              | -       | -       | -       | -       | -       | 1       | -       | -       |
|         | (0.4%)         |         |         |         |         |         | (0.8%)          |         |         |         |         |         | (0.7%)  |         |         |

**Figure S4 Pass rates for each ethnicity and country of graduation category for all licensing assessments**

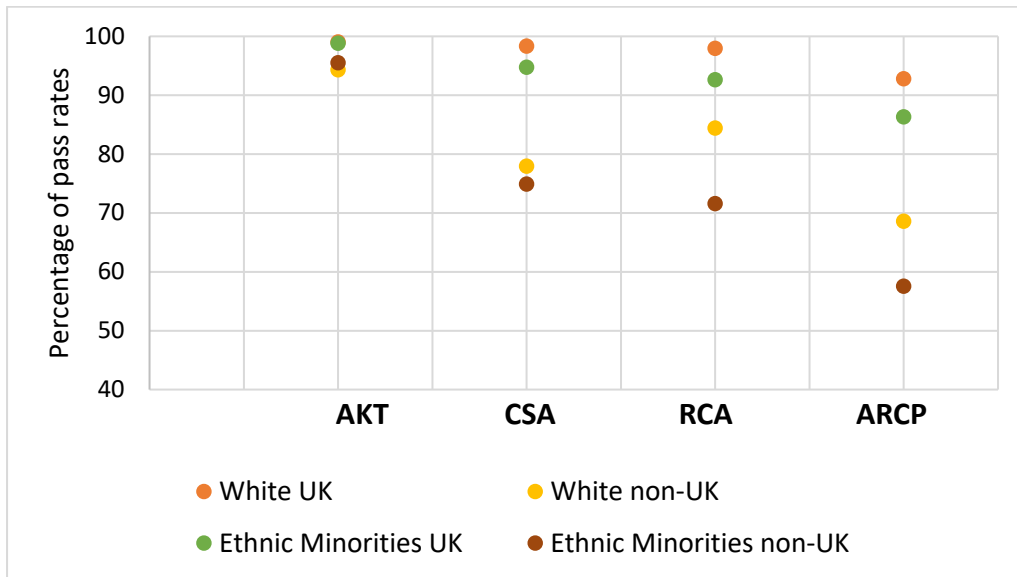

Supplement: BJGP.2022.0474_suppl.pdf [file BJGP.2022.0474_suppl.pdf]
